# Supplementary material for: Vibrational Spectra and Molecular Vibrational Behaviors of Dibenzyl Disulfide, Dibenzyl Sulphide and Bibenzyl
Source: MDPI journal article supplement (doi:10.3390/ijms23041958), 2022-02-10
Supplement: s1 [file s1]

# Supplementary Material

## 4. Vibration analysis and vibrational spectra

### 4.1. PED based vibrational assignment

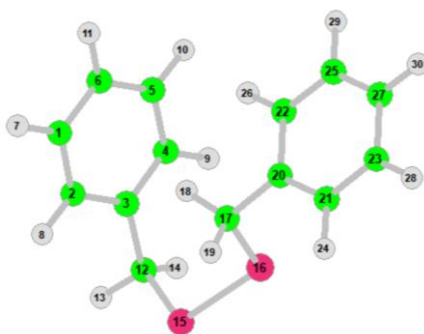

**Fig. S1.** The atomic number of DBDS-2 in VEDA4

**Table. S1.** Internal coordinates and related atoms in DBDS-2

| Stretching | Related atoms | Bending       | Related atoms     |
|------------|---------------|---------------|-------------------|
| $\nu_1$    | C(1)-H(7)     | $\delta_{30}$ | C(21)-C(23)-C(27) |
| $\nu_2$    | C(2)-H(8)     | $\delta_{31}$ | C(3)-C(12)-S(15)  |
| $\nu_3$    | C(4)-H(9)     | $\delta_{32}$ | H(7)-C(1)-C(2)    |
| $\nu_4$    | C(5)-H(10)    | $\delta_{33}$ | H(8)-C(2)-C(1)    |
| $\nu_5$    | C(6)-H(11)    | $\delta_{34}$ | H(9)-C(4)-C(5)    |
| $\nu_6$    | C(12)-H(13)   | $\delta_{35}$ | H(10)-C(5)-C(6)   |
| $\nu_7$    | C(12)-H(14)   | $\delta_{36}$ | H(11)-C(6)-C(1)   |
| $\nu_8$    | C(17)-H(18)   | $\delta_{37}$ | H(13)-C(12)-S(15) |
| $\nu_9$    | C(17)-H(19)   | $\delta_{38}$ | H(14)-C(12)-H(13) |
| $\nu_{10}$ | C(21)-H(24)   | $\delta_{39}$ | H(18)-C(17)-S(16) |
| $\nu_{11}$ | C(22)-H(26)   | $\delta_{40}$ | H(19)-C(17)-H(18) |
| $\nu_{12}$ | C(23)-H(28)   | $\delta_{41}$ | H(24)-C(21)-C(23) |
| $\nu_{13}$ | C(25)-H(29)   | $\delta_{42}$ | H(26)-C(22)-C(25) |
| $\nu_{14}$ | C(27)-H(30)   | $\delta_{43}$ | H(28)-C(23)-C(27) |
| $\nu_{15}$ | C(2)-C(1)     | $\delta_{44}$ | H(29)-C(25)-C(27) |
| $\nu_{16}$ | C(21)-C(23)   | $\delta_{45}$ | H(30)-C(27)-C(25) |
| $\nu_{17}$ | C(1)-C(6)     | $\delta_{46}$ | C(2)-C(1)-C(6)    |
| $\nu_{18}$ | C(6)-C(5)     | $\delta_{47}$ | C(1)-C(6)-C(5)    |
| $\nu_{19}$ | C(22)-C(25)   | $\delta_{48}$ | C(6)-C(5)-C(4)    |
| $\nu_{20}$ | C(4)-C(3)     | $\delta_{49}$ | C(22)-C(25)-C(27) |
| $\nu_{21}$ | C(5)-C(4)     | $\delta_{50}$ | C(4)-C(3)-C(12)   |

| v22     | C(23)-C(27) | δ51                     | C(5)-C(4)-C(3)    |
|---------|-------------|-------------------------|-------------------|
| v23     | C(27)-C(25) | δ52                     | C(23)-C(27)-C(25) |
| v24     | C(20)-C(22) | δ53                     | C(20)-C(22)-C(25) |
| v25     | C(3)-C(12)  | δ54                     | C(17)-C(20)-C(22) |
| v26     | C(17)-C(20) | δ55                     | C(12)-S(15)-S(16) |
| v27     | S(15)-C(12) | δ56                     | S(16)-C(17)-C(20) |
| v28     | S(16)-C(17) | δ57                     | S(15)-S(16)-C(17) |
| v29     | S(15)-S(16) |                         |                   |
| Torsion |             | Related atoms           |                   |
|         | τ58         | H(7)-C(1)-C(2)-C(3)     |                   |
|         | τ59         | H(8)-C(2)-C(1)-C(6)     |                   |
|         | τ60         | H(9)-C(4)-C(5)-C(6)     |                   |
|         | τ61         | H(10)-C(5)-C(6)-C(1)    |                   |
|         | τ62         | H(11)-C(6)-C(1)-C(2)    |                   |
|         | τ63         | H(13)-C(12)-S(15)-S(16) |                   |
|         | τ64         | H(14)-C(12)-S(15)-S(16) |                   |
|         | τ65         | H(18)-C(17)-S(16)-S(15) |                   |
|         | τ66         | H(19)-C(17)-S(16)-S(15) |                   |
|         | τ67         | H(24)-C(21)-C(23)-C(27) |                   |
|         | τ68         | H(26)-C(22)-C(25)-C(27) |                   |
|         | τ69         | H(28)-C(23)-C(27)-C(25) |                   |
|         | τ70         | H(29)-C(25)-C(27)-C(23) |                   |
|         | τ71         | H(30)-C(27)-C(25)-C(22) |                   |
|         | τ72         | C(2)-C(1)-C(6)-C(5)     |                   |
|         | τ73         | C(21)-C(23)-C(27)-C(25) |                   |
|         | τ74         | C(1)-C(6)-C(5)-C(4)     |                   |
|         | τ75         | C(6)-C(5)-C(4)-C(3)     |                   |
|         | τ76         | C(4)-C(3)-C(12)-S(15)   |                   |
|         | τ77         | C(5)-C(4)-C(3)-C(12)    |                   |
|         | τ78         | C(23)-C(27)-C(25)-C(22) |                   |
|         | τ79         | C(20)-C(22)-C(25)-C(27) |                   |
|         | τ80         | C(3)-C(12)-S(15)-S(16)  |                   |
|         | τ81         | C(12)-S(15)-S(16)-C(17) |                   |
|         | τ82         | S(16)-C(17)-C(20)-C(21) |                   |
|         | τ83         | S(15)-S(16)-C(17)-C(20) |                   |
|         | γ84         | C(17)-C(21)-C(22)-C(20) |                   |

**Table. S2.** Assignment of normal mode of DBDS-2.

| Mode | Frequency  | Vibration assignment (>10%)                  |
|------|------------|----------------------------------------------|
| #1   | 3077.9556  | % 20v(1)+% 17v(3)+% 22v(4)+% 35v(5)          |
| #2   | 3076.77952 | % 18v(11)+% 21v(12)+% 23v(13)+% 31v(14)      |
| #3   | 3070.44604 | % 25v(1)+% 50v(3)                            |
| #4   | 3069.69412 | % 48v(11)+% 26v(12)                          |
| #5   | 3062.7244  | % 24v(1)+% 19v(2)+% 17v(3)+% 11v(4)+% 28v(5) |

---

|     |            |                                              |
|-----|------------|----------------------------------------------|
| #6  | 3061.84716 | %22v(10)+%18v(11)+%18v(12)+%13v(13)+%28v(14) |
| #7  | 3052.77592 | %30v(2)+%12v(3)+%44v(4)+%13v(5)              |
| #8  | 3052.44816 | %38v(10)+%10v(11)+%36v(13)                   |
| #9  | 3047.48356 | %27v(1)+%42v(2)+%12v(4)+%15v(5)              |
| #10 | 3046.74128 | %29v(10)+%28v(12)+%18v(13)+%23v(14)          |
| #11 | 3041.44892 | %78v(8)+%21v(9)                              |
| #12 | 3007.36188 | %23v(6)+%76v(7)                              |
| #13 | 2971.53964 | %21v(8)+%79v(9)                              |
| #14 | 2947.3818  | %76v(6)+%23v(7)                              |
| #15 | 1589.85772 | %29v(16)                                     |
| #16 | 1588.58524 | %29v(15)+%11v(18)                            |
| #17 | 1570.115   | %28v(23)+%21v(24)+%10δ(30)                   |
| #18 | 1569.27632 | %27v(18)+%23v(20)                            |
| #19 | 1474.89108 | %14δ(41)+%14δ(42)+%16δ(43)+%15δ(44)          |
| #20 | 1474.5344  | %18δ(32)+%14δ(33)+%14δ(34)+%15δ(35)          |
| #21 | 1437.16012 | %28δ(40)+%10δ(45)                            |
| #22 | 1434.42236 | %15δ(36)                                     |
| #23 | 1431.04836 | %39δ(40)+%11τ(66)                            |
| #24 | 1417.31136 | %56δ(38)+%12τ(63)+%16τ(64)                   |
| #25 | 1311.91724 | %24δ(41)+%26δ(42)+%10δ(43)+%10δ(45)          |
| #26 | 1311.46416 | %10δ(32)+%24δ(33)+%25δ(34)                   |
| #27 | 1295.7124  | %18v(15)+%17v(17)+%23v(20)+%16v(21)          |
| #28 | 1294.88336 | %17v(16)+%17v(19)+%18v(22)+%23v(24)          |
| #29 | 1226.55504 | %10v(26)+%25δ(40)+%20τ(65)+%28τ(66)          |
| #30 | 1220.2312  | %10v(25)+%29δ(38)+%14τ(63)+%20τ(64)          |
| #31 | 1189.11328 | %32v(25)                                     |
| #32 | 1187.12744 | %33v(26)                                     |
| #33 | 1161.48504 | %17δ(32)+%21δ(33)+%20δ(34)+%18δ(35)          |
| #34 | 1160.897   | %21δ(41)+%21δ(42)+%16δ(43)+%17δ(44)          |
| #35 | 1141.12536 | %16δ(36)+%11δ(43)+%10δ(44)+%22δ(45)          |
| #36 | 1140.894   | %10δ(32)+%11δ(35)+%22δ(36)+%17δ(45)          |
| #37 | 1122.0478  | %46δ(37)+%12τ(63)+%17τ(64)                   |
| #38 | 1111.84868 | %39δ(39)+%10τ(65)+%27τ(66)                   |
| #39 | 1060.81452 | %13v(15)+%15v(21)+%12δ(36)+%12δ(37)          |
| #40 | 1057.86468 | %12v(16)+%13v(19)+%17δ(39)+%11δ(45)          |
| #41 | 1015.41976 | %22v(22)+%20v(23)+%13δ(30)+%11δ(43)+%11δ(44) |
| #42 | 1014.61    | %24v(17)+%21v(18)+%11δ(35)+%15δ(46)          |
| #43 | 985.91172  | %20δ(46)+%15δ(47)+%10δ(48)                   |
| #44 | 985.48756  | %20δ(30)+%10δ(49)+%15δ(52)                   |
| #45 | 967.7596   | %14τ(58)+%17τ(61)+%23τ(62)+%12τ(72)          |
| #46 | 966.70884  | %16τ(69)+%14τ(70)+%25τ(71)                   |
| #47 | 947.3228   | %23τ(58)+%19τ(59)+%14τ(60)+%22τ(61)          |
| #48 | 944.54648  | %18τ(67)+%20τ(68)+%27τ(69)+%26τ(70)          |
| #49 | 899.52768  | %24τ(67)+%25τ(68)+%30τ(71)                   |

---

|     |           |                                                                                                  |
|-----|-----------|--------------------------------------------------------------------------------------------------|
| #50 | 894.70768 | %24 $\tau$ (59)+%27 $\tau$ (60)+%28 $\tau$ (62)                                                  |
| #51 | 878.13652 | %28 $\delta$ (39)+%38 $\tau$ (65)                                                                |
| #52 | 863.33912 | %20 $\delta$ (37)+%30 $\tau$ (63)+%11 $\tau$ (64)                                                |
| #53 | 826.7264  | %14 $\tau$ (70)+%13 $\tau$ (69)+%12 $\tau$ (60)+%12 $\tau$ (59)+%15 $\tau$ (67)+%13 $\tau$ (68)  |
| #54 | 824.20072 | %13 $\tau$ (58)+%14 $\tau$ (59)+%15 $\tau$ (60)+%12 $\tau$ (61)+%12 $\tau$ (67)+%11 $\tau$ (68)  |
| #55 | 797.48828 | %21 $\nu$ (26)+%33 $\delta$ (52)                                                                 |
| #56 | 795.41568 | %21 $\nu$ (25)+%35 $\delta$ (47)+%11 $\delta$ (48)                                               |
| #57 | 759.52596 | %10 $\nu$ (28)+%10 $\tau$ (69)+%11 $\tau$ (70)+%11 $\tau$ (71)+%17 $\tau$ (79)+%14 $\gamma$ (84) |
| #58 | 750.715   | %18 $\tau$ (58)+%15 $\tau$ (61)+%14 $\tau$ (62)+%22 $\tau$ (75)                                  |
| #59 | 687.36092 | %12 $\tau$ (67)+%11 $\tau$ (68)+%18 $\tau$ (71)+%14 $\tau$ (73)+%11 $\tau$ (78)+%27 $\tau$ (79)  |
| #60 | 685.7414  | %13 $\tau$ (59)+%13 $\tau$ (60)+%19 $\tau$ (62)+%13 $\tau$ (72)+%12 $\tau$ (74)+%25 $\tau$ (75)  |
| #61 | 665.2082  | %44 $\nu$ (28)+%20 $\tau$ (79)                                                                   |
| #62 | 631.59352 | %57 $\nu$ (27)                                                                                   |
| #63 | 615.42724 | %23 $\delta$ (30)+%34 $\delta$ (49)+%20 $\delta$ (53)                                            |
| #64 | 614.07764 | %23 $\delta$ (46)+%32 $\delta$ (48)+%19 $\delta$ (51)                                            |
| #65 | 555.37968 | %12 $\delta$ (31)+%15 $\delta$ (51)                                                              |
| #66 | 551.78396 | %15 $\delta$ (53)                                                                                |
| #67 | 472.63956 | %13 $\nu$ (28)+%25 $\nu$ (29)+%16 $\gamma$ (84)                                                  |
| #68 | 466.66276 | %13 $\nu$ (27)+%10 $\tau$ (72)+%25 $\tau$ (74)                                                   |
| #69 | 457.28304 | %69 $\nu$ (29)                                                                                   |

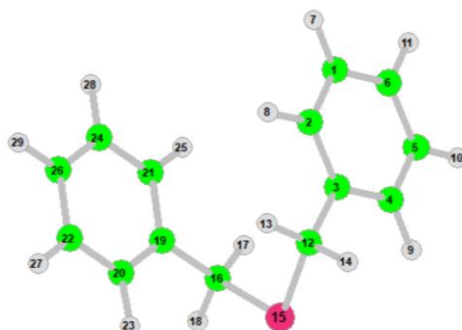

**Fig. S2.** The atomic number of DBS in VEDA4

**Table. S3.** Internal coordinates and related atoms in DBS

| Stretching | Related atoms | Bending     | Related atoms |
|------------|---------------|-------------|---------------|
| $\nu$ 1    | C(1)-H(7)     | $\delta$ 29 | $\delta$ 29   |
| $\nu$ 2    | C(2)-H(8)     | $\delta$ 30 | $\delta$ 30   |
| $\nu$ 3    | C(4)-H(9)     | $\delta$ 31 | $\delta$ 31   |
| $\nu$ 4    | C(5)-H(10)    | $\delta$ 32 | $\delta$ 32   |
| $\nu$ 5    | C(6)-H(11)    | $\delta$ 33 | $\delta$ 33   |
| $\nu$ 6    | C(12)-H(13)   | $\delta$ 34 | $\delta$ 34   |
| $\nu$ 7    | C(12)-H(14)   | $\delta$ 35 | $\delta$ 35   |
| $\nu$ 8    | C(16)-H(17)   | $\delta$ 36 | $\delta$ 36   |
| $\nu$ 9    | C(16)-H(18)   | $\delta$ 37 | $\delta$ 37   |

|     |             |     |     |
|-----|-------------|-----|-----|
| v10 | C(20)-H(23) | δ38 | δ38 |
| v11 | C(21)-H(25) | δ39 | δ39 |
| v12 | C(22)-H(27) | δ40 | δ40 |
| v13 | C(24)-H(28) | δ41 | δ41 |
| v14 | C(26)-H(29) | δ42 | δ42 |
| v15 | C(1)-C(6)   | δ43 | δ43 |
| v16 | C(2)-C(1)   | δ44 | δ44 |
| v17 | C(4)-C(5)   | δ45 | δ45 |
| v18 | C(20)-C(22) | δ46 | δ46 |
| v19 | C(26)-C(24) | δ47 | δ47 |
| v20 | C(3)-C(2)   | δ48 | δ48 |
| v21 | C(6)-C(5)   | δ49 | δ49 |
| v22 | C(21)-C(19) | δ50 | δ50 |
| v23 | C(22)-C(26) | δ51 | δ51 |
| v24 | C(24)-C(21) | δ52 | δ52 |
| v25 | C(12)-C(3)  | δ53 | δ53 |
| v26 | C(19)-C(16) | δ54 | δ54 |
| v27 | S(15)-C(12) | δ55 | δ55 |
| v28 | S(15)-C(16) |     |     |

| Torsion | Related atoms           |
|---------|-------------------------|
| τ56     | H(7)-C(1)-C(2)-C(3)     |
| τ57     | H(8)-C(2)-C(1)-C(6)     |
| τ58     | H(9)-C(4)-C(5)-C(6)     |
| τ59     | H(10)-C(5)-C(6)-C(1)    |
| τ60     | H(11)-C(6)-C(1)-C(2)    |
| τ61     | H(13)-C(12)-S(15)-C(16) |
| τ62     | H(14)-C(12)-S(15)-C(16) |
| τ63     | H(17)-C(16)-S(15)-C(12) |
| τ64     | H(18)-C(16)-S(15)-C(12) |
| τ65     | H(23)-C(20)-C(22)-C(26) |
| τ66     | H(25)-C(21)-C(24)-C(26) |
| τ67     | H(27)-C(22)-C(26)-C(24) |
| τ68     | H(28)-C(24)-C(26)-C(22) |
| τ69     | H(29)-C(26)-C(24)-C(21) |
| τ70     | C(2)-C(1)-C(6)-C(5)     |
| τ71     | C(4)-C(5)-C(6)-C(1)     |
| τ72     | C(20)-C(22)-C(26)-C(24) |
| τ73     | C(26)-C(24)-C(21)-C(19) |
| τ74     | C(3)-C(2)-C(1)-C(6)     |
| τ75     | C(21)-C(19)-C(16)-S(15) |
| τ76     | C(22)-C(26)-C(24)-C(21) |
| τ77     | C(24)-C(21)-C(19)-C(16) |
| τ78     | C(19)-C(16)-S(15)-C(12) |
| τ79     | S(15)-C(12)-C(3)-C(4)   |

$\tau_{80}$ 

C(16)-S(15)-C(12)-C(3)

 $\gamma_{81}$ 

C(12)-C(4)-C(2)-C(3)

**Table. S4.** Assignment of normal mode of DBS.

| Mode | Frequency | Vibration assignment (>10%)                                                                   |
|------|-----------|-----------------------------------------------------------------------------------------------|
| #1   | 3075.748  | % 10 $\nu$ (1)+% 10 $\nu$ (4)+% 16 $\nu$ (5)+% 13 $\nu$ (12)+% 12 $\nu$ (13)+% 21 $\nu$ (14)  |
| #2   | 3075.555  | % 12 $\nu$ (1)+% 14 $\nu$ (4)+% 21 $\nu$ (5)+% 11 $\nu$ (12)+% 17 $\nu$ (14)                  |
| #3   | 3067.515  | % 13 $\nu$ (12)+% 13 $\nu$ (2)+% 12 $\nu$ (13)+% 11 $\nu$ (3)+% 13 $\nu$ (10)+% 18 $\nu$ (11) |
| #4   | 3066.908  | % 14 $\nu$ (1)+% 13 $\nu$ (2)+% 16 $\nu$ (3)+% 13 $\nu$ (4)+% 11 $\nu$ (10)+% 11 $\nu$ (11)   |
| #5   | 3061.664  | % 13 $\nu$ (2)+% 13 $\nu$ (3)+% 14 $\nu$ (5)+% 20 $\nu$ (10)+% 19 $\nu$ (11)+% 21 $\nu$ (14)  |
| #6   | 3061.163  | % 20 $\nu$ (2)+% 18 $\nu$ (3)+% 21 $\nu$ (5)+% 12 $\nu$ (10)+% 13 $\nu$ (11)+% 14 $\nu$ (14)  |
| #7   | 3053.171  | % 15 $\nu$ (13)+% 12 $\nu$ (3)+% 13 $\nu$ (4)+% 14 $\nu$ (10)+% 12 $\nu$ (1)+% 14 $\nu$ (12)  |
| #8   | 3052.573  | % 13 $\nu$ (12)+% 13 $\nu$ (2)+% 13 $\nu$ (3)+% 16 $\nu$ (4)+% 12 $\nu$ (10)+% 12 $\nu$ (1)   |
| #9   | 3046.51   | % 12 $\nu$ (1)+% 10 $\nu$ (4)+% 11 $\nu$ (5)+% 15 $\nu$ (12)+% 17 $\nu$ (13)+% 17 $\nu$ (14)  |
| #10  | 3046.307  | % 18 $\nu$ (1)+% 14 $\nu$ (4)+% 16 $\nu$ (5)+% 10 $\nu$ (12)+% 12 $\nu$ (13)+% 11 $\nu$ (14)  |
| #11  | 2990.685  | % 64 $\nu$ (8)+% 35 $\nu$ (9)                                                                 |
| #12  | 2990.232  | % 64 $\nu$ (6)+% 35 $\nu$ (7)                                                                 |
| #13  | 2944.152  | % 35 $\nu$ (8)+% 63 $\nu$ (9)                                                                 |
| #14  | 2943.709  | % 34 $\nu$ (6)+% 64 $\nu$ (7)                                                                 |
| #15  | 1589.366  | % 14 $\nu$ (17)+% 16 $\nu$ (18)                                                               |
| #16  | 1588.749  | % 16 $\nu$ (17)+% 14 $\nu$ (18)                                                               |
| #17  | 1570.366  | % 15 $\nu$ (15)+% 13 $\nu$ (19)+% 12 $\nu$ (20)+% 10 $\nu$ (22)                               |
| #18  | 1570.038  | % 13 $\nu$ (15)+% 16 $\nu$ (19)+% 10 $\nu$ (20)+% 12 $\nu$ (22)                               |
| #19  | 1474.679  | % 10 $\delta$ (41)+% 11 $\delta$ (42)                                                         |
| #20  | 1474.409  | % 10 $\delta$ (31)+% 10 $\delta$ (32)+% 11 $\delta$ (34)                                      |
| #21  | 1436.08   | % 14 $\delta$ (44)                                                                            |
| #22  | 1435.512  | % 14 $\delta$ (35)                                                                            |
| #23  | 1415.808  | % 22 $\delta$ (37)+% 34 $\delta$ (39)                                                         |
| #24  | 1412.173  | % 41 $\delta$ (37)+% 28 $\delta$ (39)                                                         |
| #25  | 1312.881  | % 12 $\delta$ (32)+% 10 $\delta$ (33)+% 14 $\delta$ (40)+% 16 $\delta$ (41)                   |
| #26  | 1311.618  | % 16 $\delta$ (32)+% 14 $\delta$ (33)+% 11 $\delta$ (40)+% 12 $\delta$ (41)                   |
| #27  | 1295.433  | % 11 $\nu$ (20)+% 12 $\nu$ (22)                                                               |
| #28  | 1294.266  | % 10 $\nu$ (17)+% 12 $\nu$ (20)+% 11 $\nu$ (22)                                               |
| #29  | 1237.294  | % 19 $\tau$ (62)+% 19 $\tau$ (64)                                                             |
| #30  | 1223.017  | -                                                                                             |
| #31  | 1181.421  | % 16 $\nu$ (25)+% 22 $\nu$ (26)                                                               |
| #32  | 1178.403  | % 21 $\nu$ (25)+% 16 $\nu$ (26)                                                               |
| #33  | 1161.928  | % 10 $\delta$ (33)+% 13 $\delta$ (40)+% 11 $\delta$ (41)+% 10 $\delta$ (43)                   |
| #34  | 1160.752  | % 10 $\delta$ (31)+% 11 $\delta$ (32)+% 13 $\delta$ (33)+% 10 $\delta$ (40)                   |
| #35  | 1154.833  | % 24 $\delta$ (36)+% 23 $\delta$ (38)+% 12 $\tau$ (62)+% 12 $\tau$ (64)                       |
| #36  | 1140.181  | % 18 $\delta$ (35)+% 10 $\delta$ (43)+% 19 $\delta$ (44)                                      |
| #37  | 1139.949  | % 10 $\delta$ (31)+% 19 $\delta$ (35)+% 17 $\delta$ (44)                                      |
| #38  | 1130.049  | % 14 $\delta$ (36)+% 15 $\delta$ (38)+% 20 $\tau$ (62)+% 20 $\tau$ (64)                       |
| #39  | 1064.632  | -                                                                                             |

|     |          |                                                                                                       |
|-----|----------|-------------------------------------------------------------------------------------------------------|
| #40 | 1062.636 | -                                                                                                     |
| #41 | 1015.641 | % 11 $\nu$ (15)+% 10 $\nu$ (19)+% 13 $\nu$ (21)+% 12 $\nu$ (23)                                       |
| #42 | 1015.217 | % 10 $\nu$ (15)+% 11 $\nu$ (19)+% 12 $\nu$ (21)+% 13 $\nu$ (23)                                       |
| #43 | 985.5454 | % 19 $\delta$ (47)+% 10 $\delta$ (48)+% 14 $\delta$ (51)                                              |
| #44 | 985.4297 | % 19 $\delta$ (29)+% 14 $\delta$ (45)                                                                 |
| #45 | 966.1786 | % 10 $\tau$ (56)+% 10 $\tau$ (59)+% 13 $\tau$ (60)+% 12 $\tau$ (67)+% 11 $\tau$ (68)+% 17 $\tau$ (69) |
| #46 | 965.6292 | % 13 $\tau$ (56)+% 13 $\tau$ (59)+% 18 $\tau$ (60)+% 10 $\tau$ (67)+% 13 $\tau$ (69)                  |
| #47 | 947.612  | % 12 $\tau$ (65)+% 14 $\tau$ (66)+% 16 $\tau$ (67)+% 16 $\tau$ (68)                                   |
| #48 | 946.2142 | % 14 $\tau$ (56)+% 12 $\tau$ (57)+% 12 $\tau$ (58)+% 15 $\tau$ (59)+% 10 $\tau$ (68)                  |
| #49 | 917.9883 | -                                                                                                     |
| #50 | 896.7803 | % 13 $\tau$ (57)+% 12 $\tau$ (58)+% 15 $\tau$ (60)+% 13 $\tau$ (65)+% 14 $\tau$ (66)+% 16 $\tau$ (69) |
| #51 | 878.069  | % 12 $\tau$ (60)+% 10 $\tau$ (69)                                                                     |
| #52 | 828.7026 | % 13 $\tau$ (67)+% 13 $\tau$ (68)+% 12 $\tau$ (58)+% 11 $\tau$ (59)+% 14 $\tau$ (65)+% 12 $\tau$ (66) |
| #53 | 826.3312 | % 10 $\tau$ (56)+% 10 $\tau$ (58)+% 10 $\tau$ (65)                                                    |
| #54 | 822.7836 | -                                                                                                     |
| #55 | 793.4106 | % 15 $\nu$ (26)+% 12 $\delta$ (45)+% 23 $\delta$ (51)                                                 |
| #56 | 793.1696 | % 14 $\nu$ (25)+% 23 $\delta$ (45)+% 12 $\delta$ (51)                                                 |
| #57 | 748.6328 | % 16 $\tau$ (73)                                                                                      |
| #58 | 741.7594 | % 16 $\tau$ (73)                                                                                      |
| #59 | 691.082  | % 10 $\nu$ (28)+% 13 $\tau$ (69)                                                                      |
| #60 | 690.0312 | % 11 $\tau$ (60)+% 11 $\tau$ (73)+% 18 $\tau$ (74)                                                    |
| #61 | 681.413  | % 11 $\nu$ (27)+% 10 $\nu$ (28)+% 14 $\tau$ (73)+% 15 $\tau$ (74)                                     |
| #62 | 657.3709 | % 26 $\nu$ (27)+% 27 $\nu$ (28)                                                                       |
| #63 | 613.4125 | % 10 $\delta$ (29)+% 13 $\delta$ (46)+% 16 $\delta$ (47)+% 21 $\delta$ (48)+% 11 $\delta$ (52)        |
| #64 | 613.0269 | % 16 $\delta$ (29)+% 20 $\delta$ (46)+% 10 $\delta$ (47)+% 13 $\delta$ (48)+% 11 $\delta$ (49)        |
| #65 | 561.8674 | % 11 $\delta$ (49)+% 10 $\delta$ (52)                                                                 |
| #66 | 551.3502 | % 12 $\delta$ (49)+% 11 $\delta$ (52)                                                                 |
| #67 | 462.6332 | % 14 $\tau$ (76)+% 12 $\gamma$ (81)                                                                   |
| #68 | 458.9411 | % 12 $\tau$ (76)+% 14 $\gamma$ (81)                                                                   |

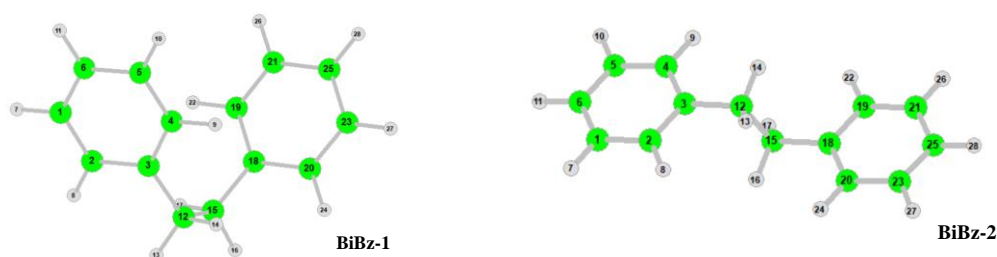

**Fig. S3.** The atomic number of BiBz-1 and BiBz-2 in VEDA4 (both are the same).

**Table. S5.** Internal coordinates and related atoms in BiBz-1 and BiBz-2 (both are the same).

| Stretching | Related atoms | Bending     | Related atoms     |
|------------|---------------|-------------|-------------------|
| $\nu$ 1    | C(1)-H(7)     | $\delta$ 28 | C(19)-C(21)-C(25) |
| $\nu$ 2    | C(2)-H(8)     | $\delta$ 29 | C(3)-C(12)-C(15)  |
| $\nu$ 3    | C(4)-H(9)     | $\delta$ 30 | H(7)-C(1)-C(2)    |

|     |             |     |                   |
|-----|-------------|-----|-------------------|
| v4  | C(5)-H(10)  | δ31 | H(8)-C(2)-C(1)    |
| v5  | C(6)-H(11)  | δ32 | H(9)-C(4)-C(5)    |
| v6  | C(12)-H(13) | δ33 | H(10)-C(5)-C(6)   |
| v7  | C(12)-H(14) | δ34 | H(11)-C(6)-C(1)   |
| v8  | C(15)-H(16) | δ35 | H(13)-C(12)-C(3)  |
| v9  | C(15)-H(17) | δ36 | H(14)-C(12)-H(13) |
| v10 | C(19)-H(22) | δ37 | H(16)-C(15)-C(12) |
| v11 | C(20)-H(24) | δ38 | H(17)-C(15)-H(16) |
| v12 | C(21)-H(26) | δ39 | H(22)-C(19)-C(21) |
| v13 | C(23)-H(27) | δ40 | H(24)-C(20)-C(23) |
| v14 | C(25)-H(28) | δ41 | H(26)-C(21)-C(25) |
| v15 | C(1)-C(6)   | δ42 | H(27)-C(23)-C(25) |
| v16 | C(2)-C(1)   | δ43 | H(28)-C(25)-C(23) |
| v17 | C(5)-C(4)   | δ44 | C(1)-C(6)-C(5)    |
| v18 | C(6)-C(5)   | δ45 | C(2)-C(1)-C(6)    |
| v19 | C(19)-C(21) | δ46 | C(5)-C(4)-C(3)    |
| v20 | C(20)-C(23) | δ47 | C(6)-C(5)-C(4)    |
| v21 | C(21)-C(25) | δ48 | C(20)-C(23)-C(25) |
| v22 | C(25)-C(23) | δ49 | C(21)-C(25)-C(23) |
| v23 | C(4)-C(3)   | δ50 | C(4)-C(3)-C(12)   |
| v24 | C(18)-C(20) | δ51 | C(18)-C(20)-C(23) |
| v25 | C(3)-C(12)  | δ52 | C(15)-C(18)-C(20) |
| v26 | C(15)-C(18) | δ53 | C(12)-C(15)-C(18) |
| v27 | C(12)-C(15) |     |                   |

| Torsion | Related atoms           |
|---------|-------------------------|
| τ54     | H(7)-C(1)-C(2)-C(3)     |
| τ55     | H(8)-C(2)-C(1)-C(6)     |
| τ56     | H(9)-C(4)-C(5)-C(6)     |
| τ57     | H(10)-C(5)-C(6)-C(1)    |
| τ58     | H(11)-C(6)-C(1)-C(2)    |
| τ59     | H(13)-C(12)-C(3)-C(4)   |
| τ60     | H(14)-C(12)-C(3)-C(4)   |
| τ61     | H(16)-C(15)-C(18)-C(19) |
| τ62     | H(17)-C(15)-C(18)-C(19) |
| τ63     | H(22)-C(19)-C(21)-C(25) |
| τ64     | H(24)-C(20)-C(23)-C(25) |
| τ65     | H(26)-C(21)-C(25)-C(23) |
| τ66     | H(27)-C(23)-C(25)-C(21) |
| τ67     | H(28)-C(25)-C(23)-C(20) |
| τ68     | C(1)-C(6)-C(5)-C(4)     |
| τ69     | C(2)-C(1)-C(6)-C(5)     |
| τ70     | C(5)-C(4)-C(3)-C(12)    |
| τ71     | C(6)-C(5)-C(4)-C(3)     |
| τ72     | C(19)-C(21)-C(25)-C(23) |



|               |                         |
|---------------|-------------------------|
| $\tau_{73}$   | C(21)-C(25)-C(23)-C(20) |
| $\tau_{74}$   | C(4)-C(3)-C(12)-C(15)   |
| $\tau_{75}$   | C(18)-C(20)-C(23)-C(25) |
| $\tau_{76}$   | C(3)-C(12)-C(15)-C(18)  |
| $\tau_{77}$   | C(12)-C(15)-C(18)-C(19) |
| $\gamma_{78}$ | C(15)-C(19)-C(20)-C(18) |

**Table. S6.** Assignment of normal mode of BiBz-1.

| Mode | Frequency  | Vibration assignment (>10%)                                             |
|------|------------|-------------------------------------------------------------------------|
| #1   | 3074.11888 | %15v(4)+%20v(5)+%16v(12)+%20v(14)                                       |
| #2   | 3074.04176 | %16v(4)+%20v(5)+%15v(12)+%19v(14)                                       |
| #3   | 3063.87156 | %19v(1)+%19v(3)+%12v(4)+%14v(10)+%14v(13)                               |
| #4   | 3063.76552 | %14v(1)+%14v(3)+%10v(4)+%19v(10)+%13v(12)+%19v(13)                      |
| #5   | 3055.81252 | %14v(1)+%16v(3)+%12v(5)+%15v(10)+%13v(13)+%11v(14)                      |
| #6   | 3055.639   | %13v(1)+%16v(3)+%11v(5)+%17v(10)+%14v(13)+%12v(14)                      |
| #7   | 3047.09796 | %11v(3)+%18v(4)+%11v(5)+%13v(10)+%22v(12)+%13v(14)                      |
| #8   | 3047.04012 | %13v(3)+%22v(4)+%13v(5)+%11v(10)+%18v(12)+%11v(14)                      |
| #9   | 3036.83136 | %18v(1)+%71v(2)                                                         |
| #10  | 3036.83136 | %71v(11)+%18v(13)                                                       |
| #11  | 2968.4452  | %15v(6)+%35v(7)+%15v(8)+%35v(9)                                         |
| #12  | 2955.74932 | %29v(6)+%21v(7)+%29v(8)+%21v(9)                                         |
| #13  | 2924.52536 | %21v(6)+%29v(7)+%21v(8)+%29v(9)                                         |
| #14  | 2919.40652 | %35v(6)+%15v(7)+%35v(8)+%15v(9)                                         |
| #15  | 1591.8532  | %16v(16)+%14v(20)                                                       |
| #16  | 1590.81208 | %13v(16)+%16v(20)                                                       |
| #17  | 1570.66448 | %17v(18)+%11v(21)+%13v(22)                                              |
| #18  | 1570.2114  | %11v(18)+%17v(21)+%12v(23)                                              |
| #19  | 1476.40456 | %10 $\delta$ (30)                                                       |
| #20  | 1474.8236  | -                                                                       |
| #21  | 1443.50324 | %35 $\delta$ (36)+%37 $\delta$ (38)                                     |
| #22  | 1437.81564 | %46 $\delta$ (36)+%42 $\delta$ (38)                                     |
| #23  | 1434.06568 | %15 $\delta$ (34)+%11 $\delta$ (43)                                     |
| #24  | 1433.57404 | %10 $\delta$ (34)+%14 $\delta$ (43)                                     |
| #25  | 1323.83228 | %12 $\delta$ (35)+%19 $\delta$ (37)+%17 $\tau$ (59)                     |
| #26  | 1318.11576 | %11 $\tau$ (60)+%11 $\tau$ (62)                                         |
| #27  | 1311.60876 | %10 $\delta$ (31)+%13 $\delta$ (32)+%14 $\delta$ (39)+%11 $\delta$ (40) |
| #28  | 1300.3878  | -                                                                       |
| #29  | 1294.652   | %10v(19)+%10v(20)+%11v(22)+%11v(23)                                     |
| #30  | 1278.6496  | %18 $\tau$ (60)+%18 $\tau$ (62)                                         |
| #31  | 1196.806   | %13v(25)+%13v(26)                                                       |
| #32  | 1180.8036  | %15v(25)+%15v(26)                                                       |
| #33  | 1169.61156 | %18 $\delta$ (35)+%24 $\delta$ (37)+%10 $\tau$ (61)                     |
| #34  | 1161.0898  | %15 $\delta$ (30)+%16 $\delta$ (31)+%18 $\delta$ (32)+%17 $\delta$ (33) |
| #35  | 1160.86808 | %17 $\delta$ (39)+%16 $\delta$ (40)+%17 $\delta$ (41)+%14 $\delta$ (42) |

|     |            |                                                                                                 |
|-----|------------|-------------------------------------------------------------------------------------------------|
| #36 | 1139.94928 | %11 $\delta$ (30)+%21 $\delta$ (34)+%18 $\delta$ (43)                                           |
| #37 | 1139.50584 | %17 $\delta$ (34)+%10 $\delta$ (41)+%11 $\delta$ (42)+%21 $\delta$ (43)                         |
| #38 | 1125.58568 | %15 $\delta$ (35)+%15 $\delta$ (37)                                                             |
| #39 | 1071.76556 | -                                                                                               |
| #40 | 1056.57292 | -                                                                                               |
| #41 | 1016.28736 | %13 $\nu$ (15)+%11 $\nu$ (18)+%10 $\nu$ (24)                                                    |
| #42 | 1015.2366  | %11 $\nu$ (15)+%12 $\nu$ (21)+%14 $\nu$ (24)                                                    |
| #43 | 986.13344  | %10 $\delta$ (28)+%13 $\delta$ (44)+%17 $\delta$ (45)                                           |
| #44 | 986.00812  | %18 $\delta$ (28)+%10 $\delta$ (45)+%13 $\delta$ (51)                                           |
| #45 | 976.79228  | %22 $\nu$ (27)+%11 $\delta$ (35)                                                                |
| #46 | 963.65296  | %12 $\tau$ (57)+%14 $\tau$ (58)+%11 $\tau$ (65)+%12 $\tau$ (67)                                 |
| #47 | 962.86248  | %11 $\tau$ (57)+%13 $\tau$ (58)+%12 $\tau$ (65)+%16 $\tau$ (67)                                 |
| #48 | 942.5028   | %15 $\tau$ (54)+%10 $\tau$ (55)+%12 $\tau$ (56)+%12 $\tau$ (57)+%12 $\tau$ (66)                 |
| #49 | 941.96296  | %10 $\tau$ (54)+%11 $\tau$ (63)+%10 $\tau$ (64)+%13 $\tau$ (65)+%18 $\tau$ (66)                 |
| #50 | 921.1502   | -                                                                                               |
| #51 | 917.18816  | %39 $\nu$ (27)+%10 $\tau$ (59)                                                                  |
| #52 | 886.70648  | %13 $\tau$ (55)+%13 $\tau$ (56)+%16 $\tau$ (58)+%13 $\tau$ (63)+%13 $\tau$ (64)+%17 $\tau$ (67) |
| #53 | 872.62244  | %13 $\tau$ (58)+%13 $\tau$ (67)                                                                 |
| #54 | 825.38644  | %15 $\tau$ (65)+%14 $\tau$ (66)+%11 $\tau$ (55)+%10 $\tau$ (57)+%14 $\tau$ (63)+%16 $\tau$ (64) |
| #55 | 824.59596  | %15 $\tau$ (54)+%15 $\tau$ (55)+%14 $\tau$ (56)+%14 $\tau$ (57)+%11 $\tau$ (66)+%11 $\tau$ (64) |
| #56 | 758.5234   | %10 $\nu$ (25)+%10 $\nu$ (26)+%19 $\delta$ (44)+%19 $\delta$ (51)                               |
| #57 | 753.125    | %11 $\delta$ (44)+%12 $\delta$ (51)                                                             |
| #58 | 742.24144  | %12 $\tau$ (71)+%12 $\tau$ (74)                                                                 |
| #59 | 733.7486   | %11 $\tau$ (74)                                                                                 |
| #60 | 690.16616  | %11 $\tau$ (67)+%10 $\tau$ (71)+%16 $\tau$ (74)                                                 |
| #61 | 689.46244  | %11 $\tau$ (58)+%12 $\tau$ (71)+%13 $\tau$ (74)                                                 |
| #62 | 616.16952  | %10 $\delta$ (28)+%14 $\delta$ (45)+%12 $\delta$ (46)+%20 $\delta$ (47)+%16 $\delta$ (48)       |
| #63 | 615.8032   | %12 $\delta$ (28)+%12 $\delta$ (45)+%10 $\delta$ (46)+%18 $\delta$ (47)+%19 $\delta$ (48)       |
| #64 | 574.40904  | %13 $\delta$ (29)+%11 $\delta$ (53)                                                             |
| #65 | 525.54388  | -                                                                                               |
| #66 | 498.10844  | %11 $\delta$ (46)+%12 $\delta$ (50)                                                             |
| #67 | 476.92936  | %12 $\tau$ (68)                                                                                 |

**Table. S7.** Assignment of normal mode of BiBz-2.

| Mode | Frequency | Vibration assignment (>10%)                                                            |
|------|-----------|----------------------------------------------------------------------------------------|
| #1   | 3074.35   | %11 $\nu$ (1)+%11 $\nu$ (4)+%24 $\nu$ (5)+%11 $\nu$ (12)+%11 $\nu$ (13)+%24 $\nu$ (14) |
| #2   | 3074.186  | %11 $\nu$ (1)+%11 $\nu$ (4)+%25 $\nu$ (5)+%11 $\nu$ (12)+%11 $\nu$ (13)+%24 $\nu$ (14) |
| #3   | 3061.915  | %21 $\nu$ (1)+%21 $\nu$ (4)+%21 $\nu$ (12)+%21 $\nu$ (13)                              |
| #4   | 3061.818  | %21 $\nu$ (1)+%21 $\nu$ (4)+%21 $\nu$ (12)+%21 $\nu$ (13)                              |
| #5   | 3053.422  | %22 $\nu$ (5)+%22 $\nu$ (14)                                                           |
| #6   | 3053.306  | %22 $\nu$ (5)+%22 $\nu$ (14)                                                           |
| #7   | 3040.302  | %21 $\nu$ (2)+%22 $\nu$ (3)+%21 $\nu$ (10)+%21 $\nu$ (11)                              |
| #8   | 3039.887  | %21 $\nu$ (2)+%22 $\nu$ (3)+%21 $\nu$ (10)+%22 $\nu$ (11)                              |
| #9   | 3039.058  | %17 $\nu$ (2)+%16 $\nu$ (3)+%17 $\nu$ (10)+%16 $\nu$ (11)                              |

---

|     |          |                                                       |
|-----|----------|-------------------------------------------------------|
| #10 | 3038.904 | %17v(2)+%16v(3)+%17v(10)+%16v(11)                     |
| #11 | 2972.851 | %25v(6)+%25v(7)+%25v(8)+%25v(9)                       |
| #12 | 2949.927 | %25v(6)+%25v(7)+%25v(8)+%25v(9)                       |
| #13 | 2929.307 | %25v(6)+%25v(7)+%25v(8)+%25v(9)                       |
| #14 | 2919.522 | %25v(6)+%25v(7)+%25v(8)+%25v(9)                       |
| #15 | 1591.121 | %15v(16)+%15v(19)                                     |
| #16 | 1590.581 | %15v(16)+%15v(19)                                     |
| #17 | 1570.25  | %15v(18)+%13v(22)+%12v(23)+%10v(24)                   |
| #18 | 1570.25  | %13v(18)+%16v(22)+%10v(23)+%12v(24)                   |
| #19 | 1475.151 | -                                                     |
| #20 | 1474.853 | -                                                     |
| #21 | 1452.43  | %45δ(36)+%45δ(38)                                     |
| #22 | 1435.733 | %42δ(36)+%42δ(38)                                     |
| #23 | 1433.873 | %13δ(34)+%13δ(43)                                     |
| #24 | 1433.053 | %13δ(34)+%13δ(43)                                     |
| #25 | 1315.976 | %17τ(59)+%20τ(60)+%11τ(61)+%20τ(62)                   |
| #26 | 1314.366 | %10δ(31)+%10δ(32)+%10δ(39)+%10δ(40)                   |
| #27 | 1310.23  | %13δ(31)+%13δ(32)+%13δ(39)+%13δ(40)                   |
| #28 | 1295.703 | -                                                     |
| #29 | 1295.201 | %10v(17)+%10v(20)+%10v(23)+%10v(24)                   |
| #30 | 1250.732 | %14τ(59)+%20τ(60)+%20τ(62)                            |
| #31 | 1248.274 | %25δ(37)+%11τ(60)+%11τ(62)                            |
| #32 | 1185.72  | %18v(25)+%17v(26)                                     |
| #33 | 1185.431 | %18v(25)+%18v(26)                                     |
| #34 | 1159.721 | %10δ(31)+%10δ(32)+%10δ(39)+%10δ(40)                   |
| #35 | 1159.374 | %10δ(31)+%10δ(32)+%10δ(39)+%10δ(40)                   |
| #36 | 1140.354 | %20δ(34)+%20δ(43)                                     |
| #37 | 1139.699 | %10δ(33)+%19δ(34)+%10δ(41)+%10δ(42)+%19δ(43)          |
| #38 | 1122.443 | %25δ(35)+%22δ(37)                                     |
| #39 | 1072.489 | -                                                     |
| #40 | 1051.435 | -                                                     |
| #41 | 1015.497 | %11v(15)+%11v(18)+%11v(21)+%11v(22)                   |
| #42 | 1015.073 | %11v(15)+%11v(18)+%11v(21)+%11v(22)                   |
| #43 | 985.555  | %14δ(28)+%10δ(44)+%14δ(45)+%10δ(49)                   |
| #44 | 985.0441 | %14δ(28)+%10δ(44)+%14δ(45)+%10δ(49)                   |
| #45 | 982.7016 | %60v(27)                                              |
| #46 | 964.2892 | %22δ(35)+%10δ(37)+%13τ(61)                            |
| #47 | 963.5469 | %11τ(54)+%15τ(58)+%15τ(67)                            |
| #48 | 962.4576 | %11τ(54)+%16τ(58)+%16τ(67)                            |
| #49 | 941.105  | %10τ(54)+%13τ(57)+%13τ(65)+%13τ(66)                   |
| #50 | 940.9508 | %10τ(54)+%13τ(57)+%13τ(65)+%13τ(66)                   |
| #51 | 890.8324 | %13τ(55)+%13τ(56)+%17τ(58)+%13τ(63)+%13τ(64)+%17τ(67) |
| #52 | 890.36   | %13τ(67)+%12v(27)+%10τ(56)+%13τ(58)+%10τ(63)+%10τ(64) |
| #53 | 833.3394 | %10δ(44)+%10δ(49)                                     |

---

---

|     |          |                                                       |
|-----|----------|-------------------------------------------------------|
| #54 | 824.1525 | %12τ(54)+%13τ(55)+%14τ(56)+%12τ(57)+%13τ(63)+%13τ(64) |
| #55 | 824.1332 | %12τ(65)+%13τ(55)+%13τ(56)+%12τ(66)+%14τ(63)+%14τ(64) |
| #56 | 780.493  | %12ν(25)+%12ν(26)+%20δ(44)+%20δ(49)                   |
| #57 | 747.5627 | %10δ(37)+%25τ(59)+%12τ(60)+%21τ(61)+%12τ(62)          |
| #58 | 745.8082 | %13τ(71)+%15τ(75)                                     |
| #59 | 729.9312 | %10τ(71)+%14τ(75)                                     |
| #60 | 689.6938 | %10τ(58)+%10τ(67)+%10τ(71)+%16τ(75)                   |
| #61 | 689.5588 | %10τ(58)+%10τ(67)+%10τ(71)+%15τ(75)                   |
| #62 | 616.5166 | %12δ(28)+%11δ(45)+%10δ(46)+%18δ(47)+%18δ(48)+%10δ(51) |
| #63 | 615.3501 | %12δ(28)+%12δ(45)+%10δ(46)+%18δ(47)+%18δ(48)+%10δ(51) |
| #64 | 605.1028 | %11δ(44)+%11δ(49)                                     |
| #65 | 517.7355 | -                                                     |
| #66 | 515.2387 | -                                                     |
| #67 | 465.2746 | %18τ(68)+%14γ(78)                                     |

---

### 4.3. Comparison of theoretical and experimental spectra

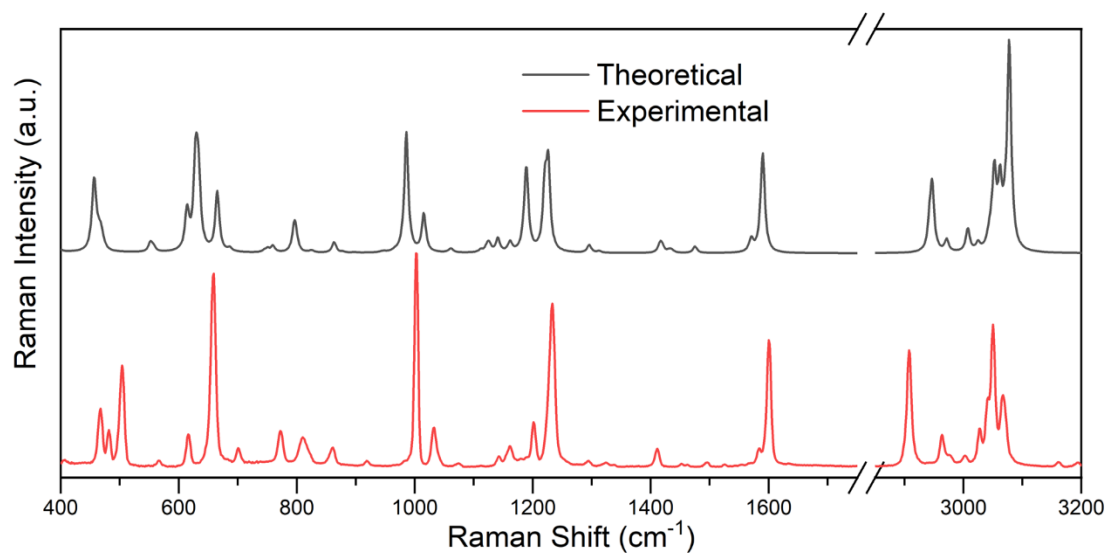

**Fig. S4.** Experimental measured and theoretically calculated Raman spectra of DBDS.

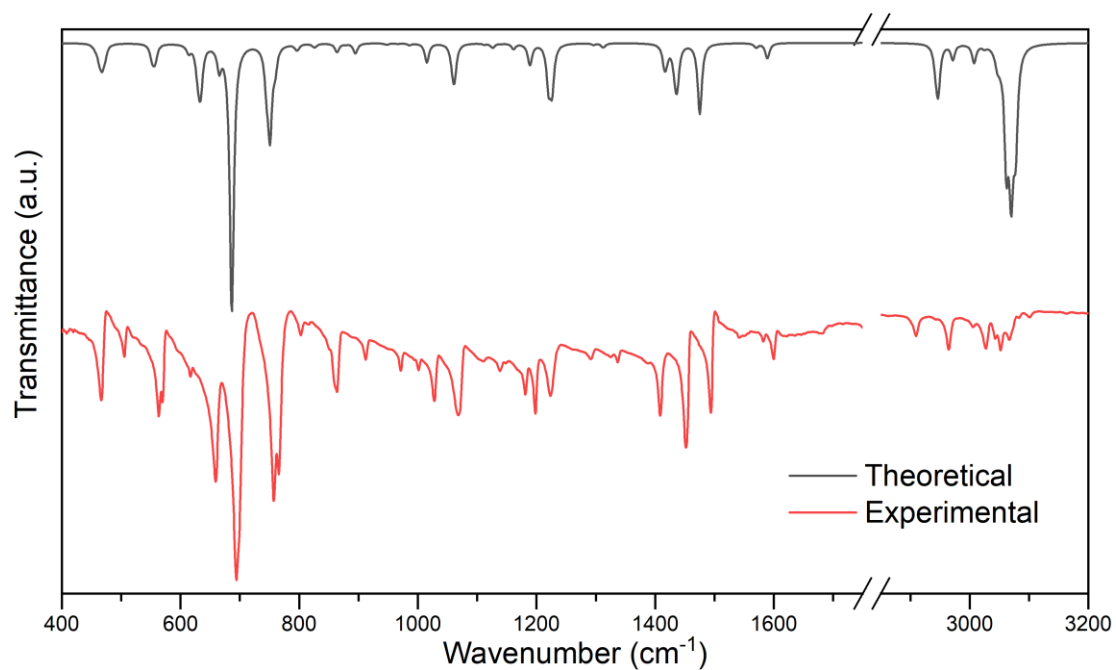

**Fig. S5.** Experimental measured and theoretically calculated IR spectra of DBDS.

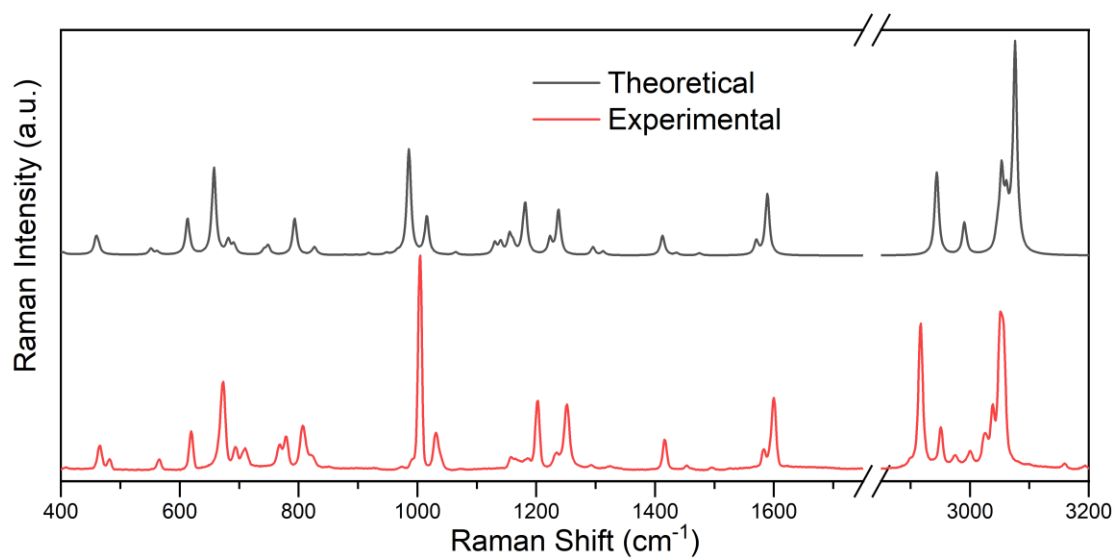

**Fig. S6.** Experimental measured and theoretically calculated Raman spectra of DBS.

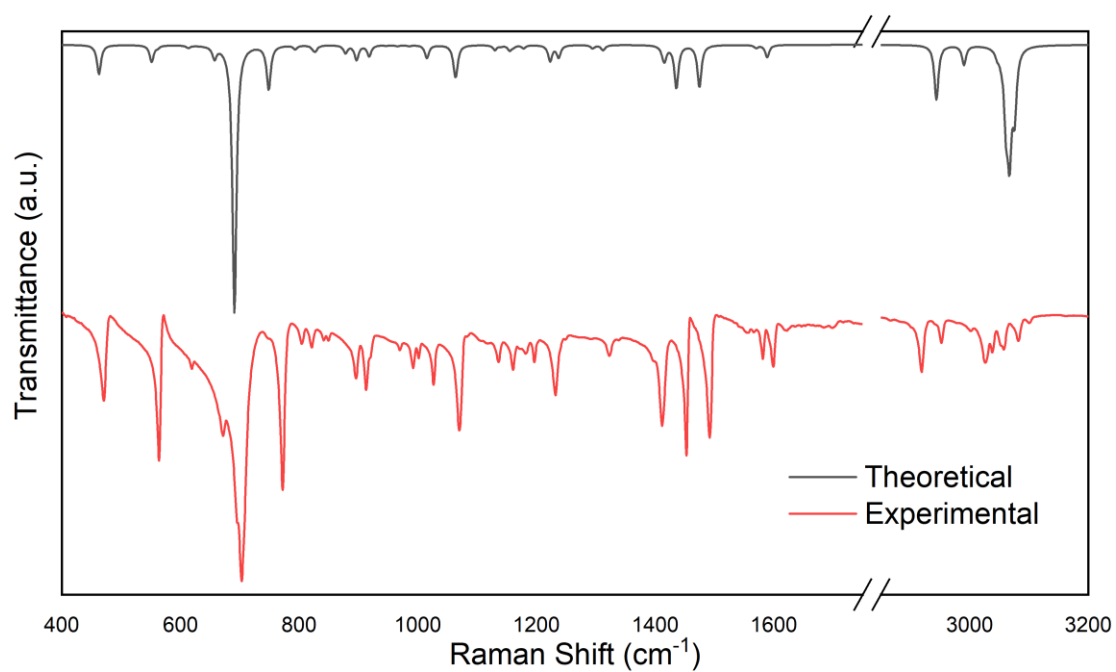

**Fig. S7.** Experimental measured and theoretically calculated IR spectra of DBS.

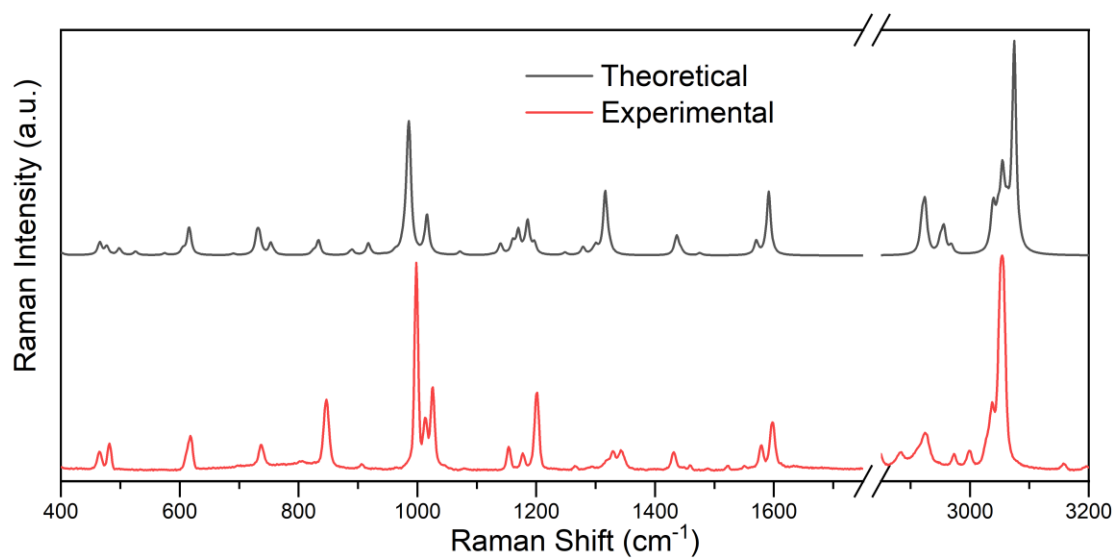

**Fig. S8.** Experimental measured and theoretically calculated Raman spectra of BiBz

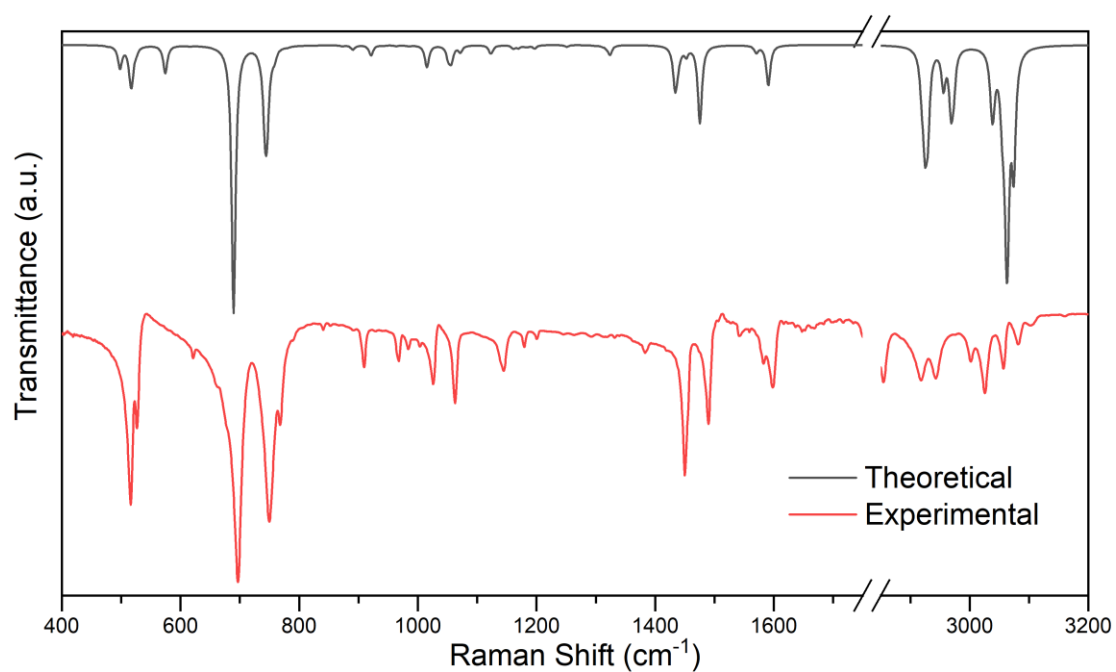

**Fig. S9.** Experimental measured and theoretically calculated IR spectra of BiBz
